# Supplementary material for: The CREB-Binding Protein Inhibitor ICG-001 Suppresses Pancreatic Cancer Growth
Source: Oxford University Press journal article supplement (doi:10.1158/1535-7163.mct-13-1005), 2014-08-01
Supplement: 15357163mct131005-sup-123006_2_supp_2555957_n8gr16.xlsx [file 15357163mct131005-sup-123006_2_supp_2555957_n8gr16.xlsx]

## Sheet: qPCR primers
QPCR PRIMERS
Gene	Primer	Sequence 5' → 3'
ACTB	FOR	CCAACCGCGAGAAGATGA
	REV	CCAGAGGCGTACAGGGATAG
AXIN2	FOR	GAAGCTGGAGTTGGAGAGCCGCC
	REV	TCTCTCTTCATCCTCTCGGATCTGC
BIRC5	FOR	TGAGAACGAGCCAGACTTGG
	REV	TGTTCCTCTATGGGGTCGTCA
CDC25A	FOR	AGCTCGGATGCTTTCCTCAA
	REV	CCACGAAGCCATCATCCTCA
SKP2	FOR	CGAGAGAACTTTCCAGGTCTG
	REV	GGCAATCACCCCTTGAGACA
CCNE2	FOR	TGTCAAGACGAAGTAGCCGT
	REV	GGCCTGGATTATCTGGGCTT
MMP7	FOR	AGTGGTCACCTACAGGATCG
	REV	GGGATCTCTTTGCCCCACAT
LGR5	FOR	AAGCCTTCAATCCCTGCGTC
	REV	CAGGCCACTGAAACAGCTTG
MXI1	FOR	CCCATGGAGCGGGTGAAGATGATCA
	REV	GGGCTCGGCTGGACGGGAAT
MYB	FOR	TGCTACCAACACAGAACCACA
	REV	CCCAAACAGGAAACAGGTGC
MXD1	FOR	AGGATCCGGATGGACAGCAT
	REV	CCACGTCAACGTCGATTTCT
ChIP-QPCR Primers
Gene	Primer	Sequence 5' → 3'
SKP2	FOR	AGTTCCTCAAGCAGGCGAAC
	REV	TGATAACCCCAGGTCAATGCC
CDKN1A	FOR	TCGTGGGGAAATGTGTCCAG
	REV	CTGGCCGAGTTCCAGCAG
CDC25A	FOR	ATTTTGATCCCCGCTCTTCT
	REV	GAAAACCAAGCCGACCTACA
