# Supplementary material for: The CREB-Binding Protein Inhibitor ICG-001 Suppresses Pancreatic Cancer Growth
Source: Oxford University Press journal article supplement (doi:10.1158/1535-7163.mct-13-1005), 2014-08-01
Supplement: 15357163mct131005-sup-123006_2_supp_2556004_n8grlq.xlsx [file 15357163mct131005-sup-123006_2_supp_2556004_n8grlq.xlsx]

## Sheet: Sheet1
Supplemental Table 2. Summary of Tumor Spread and Clinical Manifestations In Orthotopic Xenograft Model
Organ Involvement		Vehicle	ICG-001	Gemcitabine	Gemcitabine + ICG-001
Spleen		12/12 (100)	10/12 (83)	10/11 (91)	11/12 (92)
Lung		9/12 (75)	9/12 (75)	3/11 (27)	10/12 (83)
Liver		3/12 (25)	2/12 (17)	0/11 (0)	1/12 (8)
Diaphragm		9/12 (75)	9/12 (75)	8/11 (73)	10/12 (83)
Colon		2/12 (17)	0/12 (0)	0/11 (0)	1/12 (8)
Small Bowel		4/12 (33)	1/12 (8)	3/11 (27)	0/12 (0)
Rib		5/12 (42)	4/12 (33)	4 (36)	3/12 (25)
Mesentery		3/12 (25)	4/12 (33)	5 /11 (45)	10/12 (83)
Injection site		3/12 (25)	4/12 (33)	3/11 (27)	0/12 (0)
Abdominal wall		1/12 (8)	0/12	2/11 (18)	2/12 (17)
Suture line		12/12 (100)	10/12 (83)	10/11 (91)	7/12 (58)
Kidney		1/12 (8)	0/12 (0)	0/11 (0)	0/12 (0)
Adrenal		1/12 (8)	0/12 (0)	0/11 (0)	0/12 (0)
Stomach		1/12 (8)	0/12 (0)	1/11 (9)	0/12 (0)
Clinical Manifestation
Cachexia		5/12 (42)	6/12 (50)	7/11 (64)	9/12 (75)
Jaundice		1/12 (8)	2/12 (17)	1/11 (9)	1/12 (8)
Ileus		0/12 (0)	0/12 (0)	0/11 (0)	1/12 (8)
Ascites		3/12 (25)	7/12 (58)	8/11 (73)	9/12 (75)
